# Supplementary material
Source: Springer Nature journal article supplement (https://www.springermedizin.de/resource/supplementary/12887_2014_1139_MOESM1_ESM.pdf/9476614)

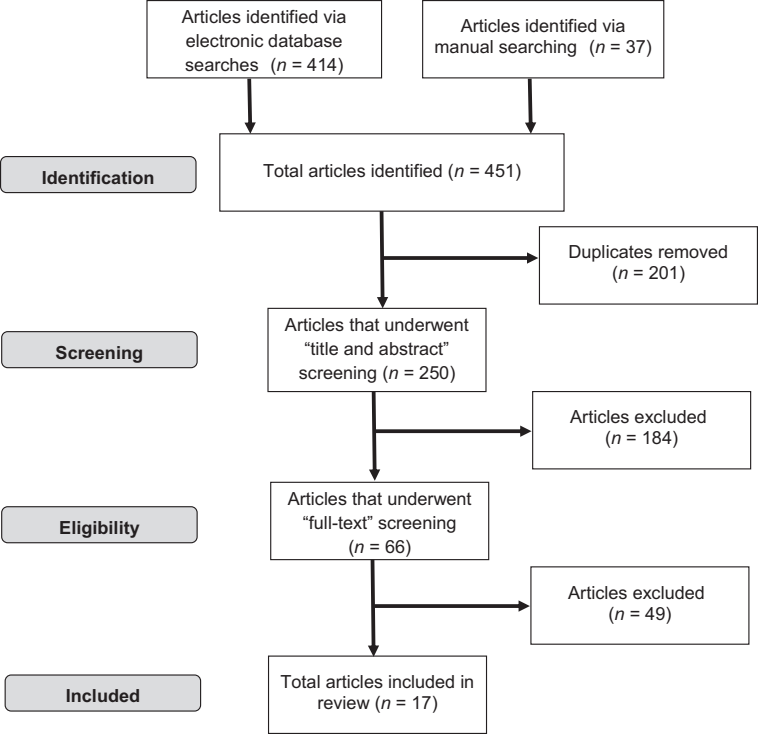

Supplement: MOESM1 [file 9476614]
